# Supplementary material for: Impact of peptide:HLA complex stability for the identification of SARS-CoV-2-specific CD8+T cells
Source: PubMed Central journal article supplement (PMC10232890; doi:10.3389/fimmu.2023.1151659), 2023-05-18
Supplement: DataSheet_1.pdf [file DataSheet_1.pdf]

## Supplementary Material

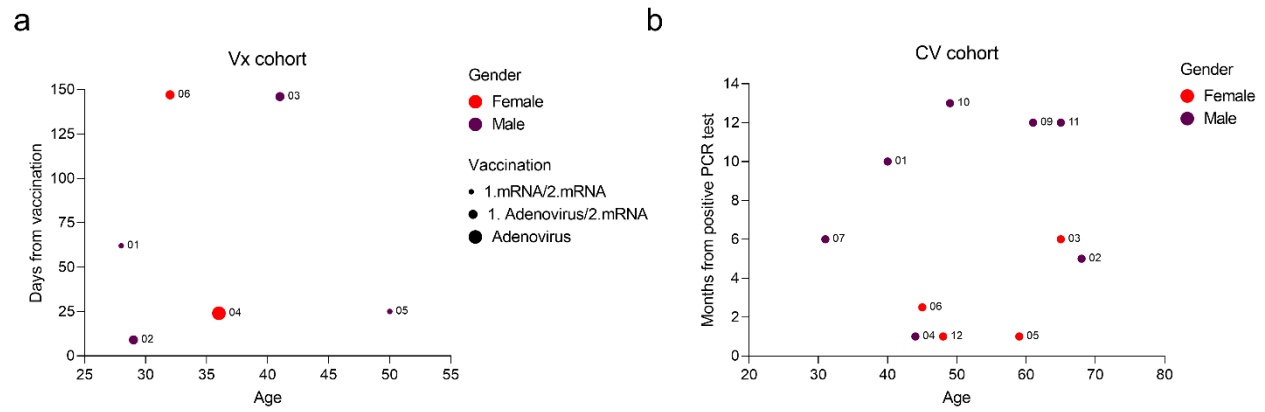

**Supplementary Figure 1:** Overview of **a**) vaccinated (Vx) and **b**) convalescent cohort (Cv).

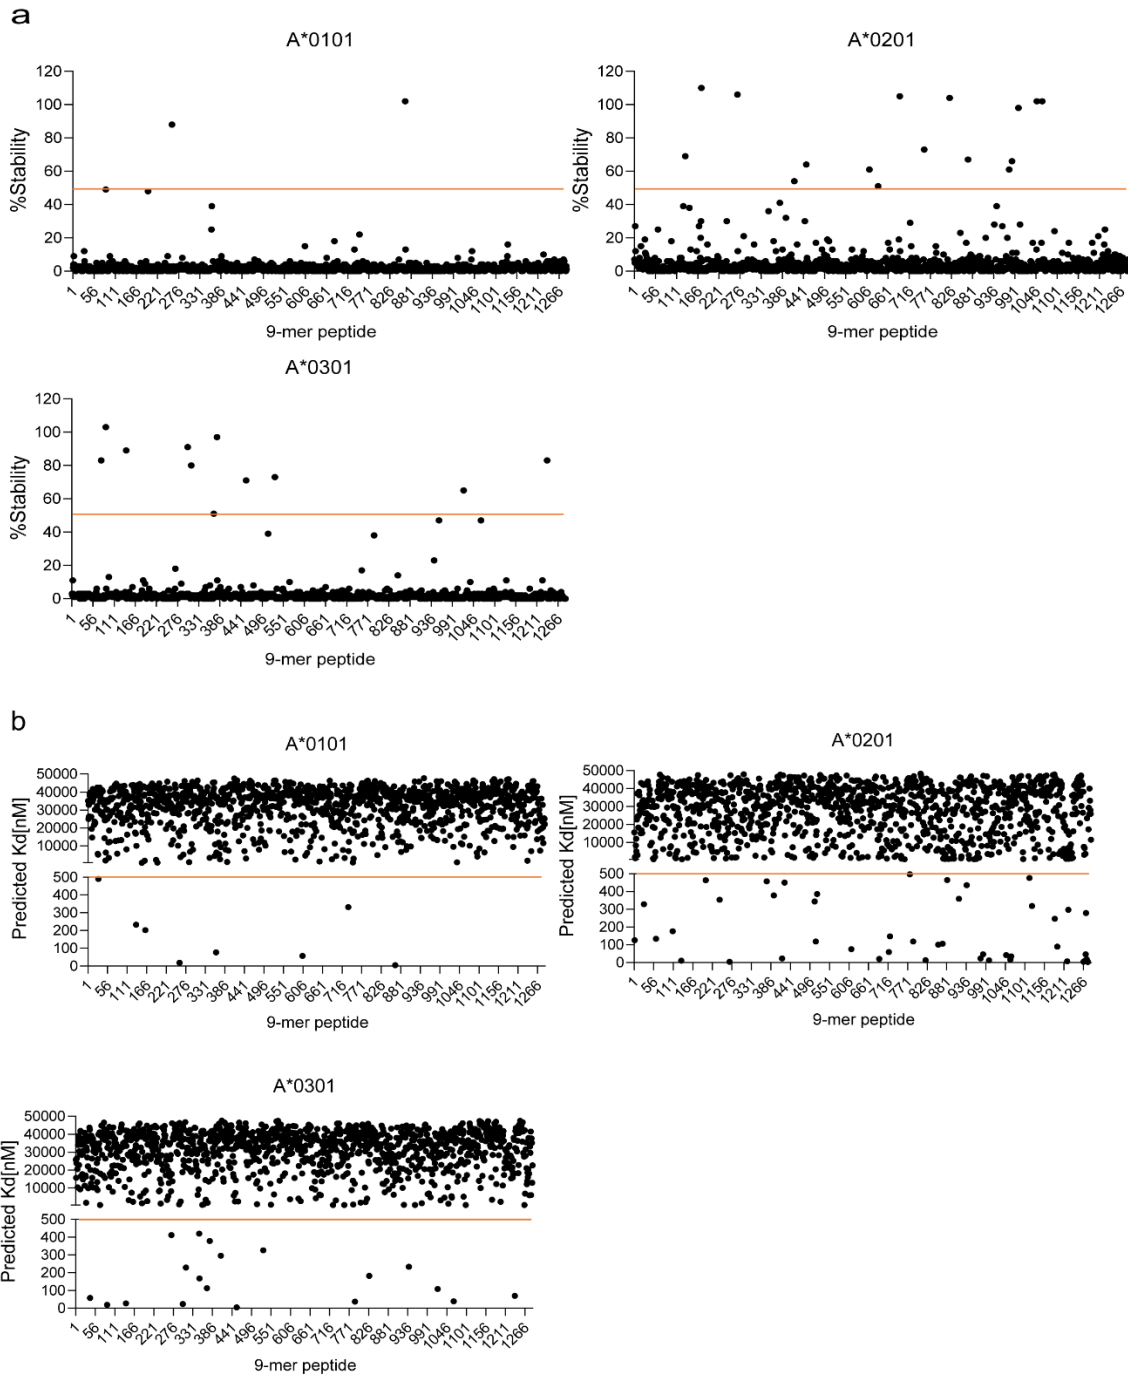

**Supplementary Figure 2: Measured stability and predicted affinity of 9-mer library from spike protein (total 1286 peptides). a) Measured stability using NeoScreen® in HLA-A\*0101, HLA-A\*0201 and HLA-A\*0301. The red line depicts the 50% cutoff which is relative to a reference peptide (stable binder) for each allele. b) *In silico* affinity prediction using NetMHC4.0 for HLA-A\*0101, HLA-A\*0201 HLA-A\*0301.**

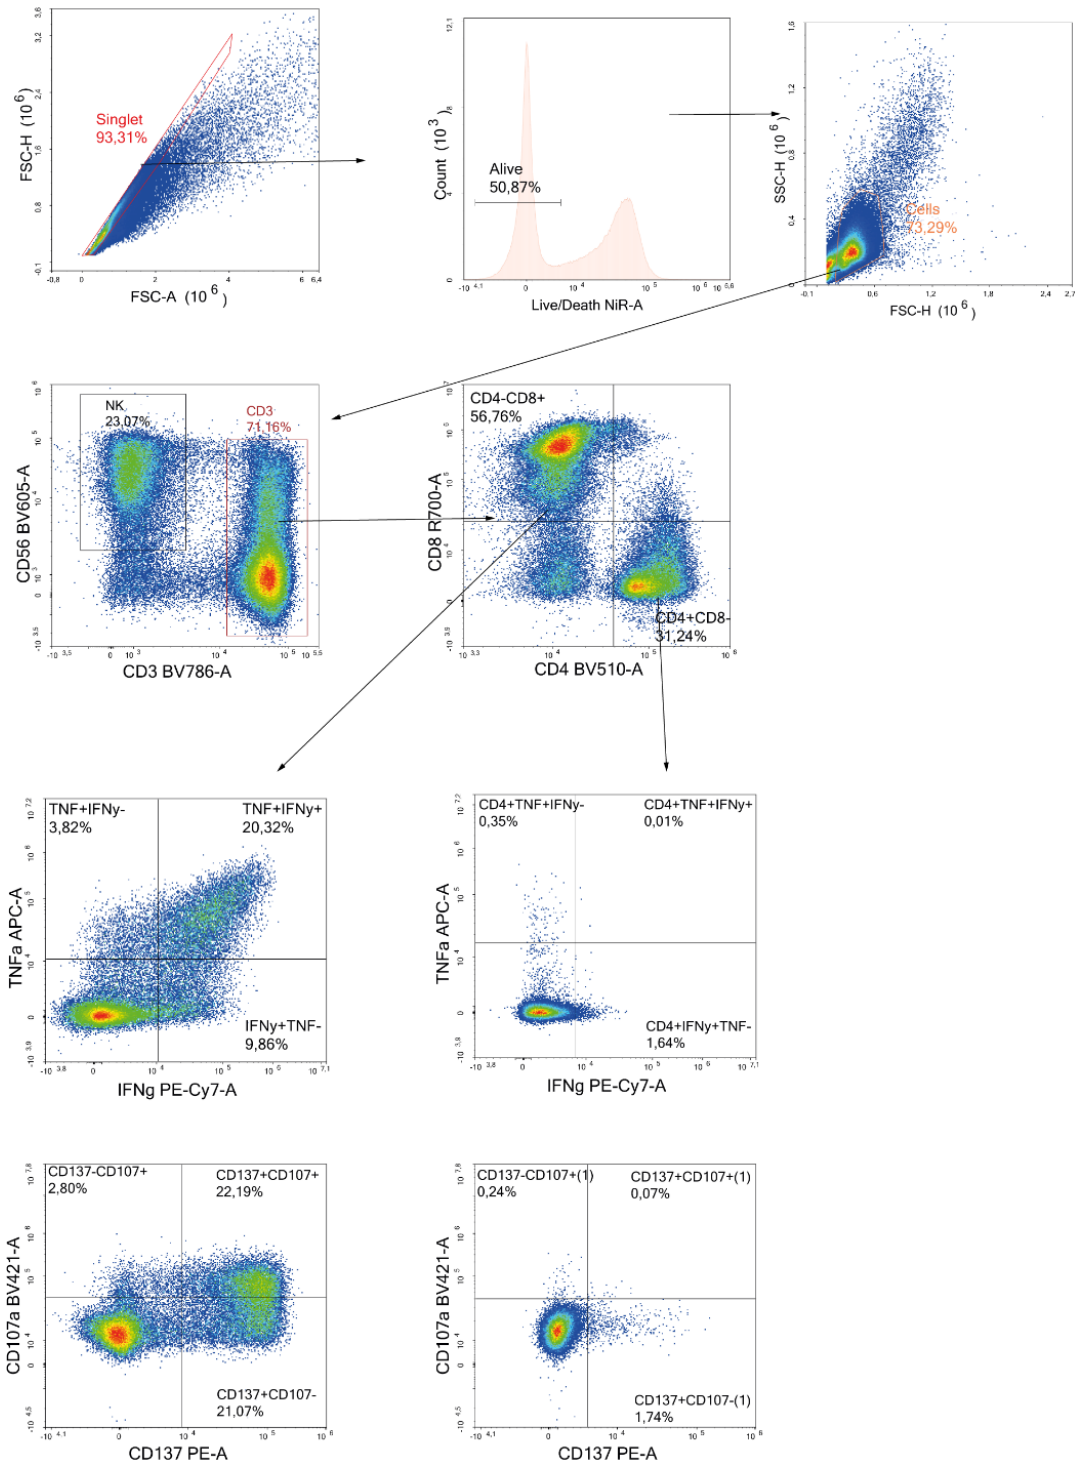

**Supplementary Figure 3:** Representative gating strategy to identify CD8<sup>+</sup> TNF- $\alpha$ <sup>+</sup> IFN- $\gamma$ <sup>+</sup> T cells and CD8<sup>+</sup> CD107a<sup>+</sup> CD137<sup>+</sup> T cells after long-term peptide stimulated PBMCs.

**Supplementary Table 1:** List of peptides which are part of the High Stab pool and Low Stab pool for each of the three studied alleles HLA-A\*0101, -A\*0201 and -A\*0301. For each peptide, the measured stability (relative to reference peptide) and the predicted affinity (nM) is shown.

| <b>A*0101</b> |            |               |               |
|---------------|------------|---------------|---------------|
|               | Peptide    | Stability (%) | Affinity (Kd) |
| High          | LTDEMIAQY  | 102           | 3             |
|               | WTAGAAAYY  | 88            | 12            |
|               | FNDGVYFAS  | 49            | 20788         |
|               | NIDGYFKIY  | 48            | 1968          |
| Low           | CVADYSVLY  | 25            | 194           |
|               | TSNQVAVLY  | 15            | 105           |
|               | NSFTRGVYY  | 12            | 328           |
|               | CNDPFLGVY  | 6             | 289           |
| <b>A*0201</b> |            |               |               |
|               | Peptide    | Stability (%) | Affinity (Kd) |
| High          | YLQPRTFLL  | 106           | 5             |
|               | SIIAYTMSL  | 105           | 14            |
|               | LLFNKVTLA  | 104           | 25            |
|               | HLMSFPQSA  | 102           | 26            |
|               | FLHVITYVPA | 102           | 65            |
|               | RLQSLQTYV  | 98            | 17            |
|               | FQFCNDPFL  | 69            | 9             |
|               | MIAQYTSAL  | 67            | 69            |
|               | RLDKVEAEV  | 66            | 39            |
|               | VLNDILSRL  | 61            | 34            |
| Low           | KQIYKTPPI  | 11            | 86            |
|               | FTISVTTEI  | 29            | 25            |
|               | FIAGLIAIV  | 10            | 10            |
|               | VTWFHAIHV  | 25            | 202           |
|               | VLNENQKLI  | 20            | 194           |
|               | GMSRIGMEV  | 8             | 51            |
|               | NLNESLIDL  | 17            | 177           |
|               | VVFLHVITYV | 17            | 37            |
|               | WLMWLIINL  | 6             | 7             |
|               | GLMWLSYFI  | 5             | 4             |

**A\*0301**

|      | Peptide   | Stability (%) | Affinity (Kd) |
|------|-----------|---------------|---------------|
| High | GVYFASTK  | 103           | 24            |
|      | KCYGVSPTK | 97            | 153           |
|      | TLKSFTVEK | 91            | 59            |
|      | GVYYHKNNK | 89            | 26            |
|      | KRFDNPVLP | 83            | 34309         |
|      | MTSCCSCLK | 83            | 87            |
|      | GIYQTSNFR | 80            | 144           |
|      | KSTNLVKNK | 73            | 496           |
|      | RLFRKSNLK | 71            | 6             |
|      | ASANLAATK | 65            | 154           |
| Low  | QIYKTPPIK | 38            | 35            |
|      | SVYAWNRKR | 7             | 303           |
|      | QIAPGQTGK | 6             | 154           |
|      | TLADAGFIK | 5             | 199           |
|      | KVFRSSVLH | 3             | 90            |
|      | SSTASALGK | 2             | 194           |
|      | EILPVSMTK | 2             | 315           |
|      | VLKGVKLHY | 1             | 457           |
|      | HVSGTNGTK | 0             | 288           |
|      | NQFNSAIGK | 0             | 378           |

**Supplementary Table 2: HLA-type for vaccinated donors**

| <b>Donor</b> | <b>HLA-A</b> |           | <b>HLA-B</b> |           | <b>HLA-C</b> |           | <b>HLA-DRB1</b> |           |
|--------------|--------------|-----------|--------------|-----------|--------------|-----------|-----------------|-----------|
| Vx01         | 03:01:01G    | 29:02:01G | 39:06:02G    | 44:03:01G | 07:02:01G    | 16:01:01G | 01:01:01G       | 08:01:01G |
| Vx02         | 02:01:01G    | 32:01:01G | 27:02:01G    | 27:05:02G | 02:02:02G    | 05:01:01G | 03:01:01G       | 11:01:01G |
| Vx03         | 01:01:01G    | 03:01:01G | 08:01:01G    | 15:01:01G | 03:04:01G    | 07:01:01G | 03:01:01G       | 04:01:01G |
| Vx04         | 02:01:01G    | -         | 07:02:01G    | 15:01:01G | 07:02:01G    | 15:05:01G | 13:01:01G       | 15:01:01G |
| Vx05         | 01:01        | 02:01     | 07:02        | 18:01     | 07:02        | 07:01     | 11:04:01        | 15:01:01  |
| Vx06         | 01:01:01G    | 03:01:01G | 08:01:01G    | 35:01:01G | 04:01:01G    | 07:01:01G | 01:01:01G       | 03:01:01G |

**Supplementary Table 3: HLA-type for convalescent donors**

| <b>Donor</b> | <b>HLA-A</b> |           | <b>HLA-B</b> |           | <b>HLA-C</b> |           | <b>HLA-DRB1</b> |           |
|--------------|--------------|-----------|--------------|-----------|--------------|-----------|-----------------|-----------|
| CV01         | 01:01:01G    | 02:01:01G | 15:17:01G    | 27:05:02G | 02:02:02G    | 07:01:01G | 01:01:01G       | 11:01:01G |
| CV02         | 01:01:01G    | 25:01:01G | 07:02:01G    | 08:01:01G | 07:01:01G    | 07:02:01G | 03:01:01G       | 15:01:01G |
| CV03         | 01:01:01G    | 02:01:01G | 08:01:01G    | 15:18:01G | 07:01:01G    | 07:04:01G | 01:01:01G       | 03:01:01G |
| CV04         | 03:01:01G    | 31:01:02G | 39:01:01G    | 55:01:01G | 03:03:01G    | 12:03:01G | 11:01:01G       | 14:54:01G |
| CV05         | 01:01:01G    | 02:01:01G | 07:02:01G    | 52:01:01G | 07:02:01G    | 12:02:01G | 13:02:01G       | 15:02:01G |
| CV06         | 02:01:01G    | 32:01:01G | 15:01:01G    | 18:01:01G | 01:02:01G    | 05:01:01G | 03:01:01G       | 08:01:01G |
| CV07         | 01:01:01G    | 02:01:01G | 08:01:01G    | 15:01:01G | 03:03:01G    | 07:01:01G | 01:01:01G       | 13:01:01G |
| CV08         | 29:01:01G    | 68:01:02G | 07:05:01G    | 18:01:01G | 05:01:01G    | 15:05:01G | 11:01:01G       | 13:01:01G |
| CV09         | 01:01:01G    | 24:02:01G | 08:01:01G    | 27:05:02G | 02:02:02G    | 07:01:01G | 04:01:01G       | 15:01:01G |
| CV10         | 02:06:01G    | 03:01:01G | 13:02:01G    | 37:01:01G | 06:02:01G    | -         | 07:01:01G       | 10:01:01G |
| CV11         | 02:01:01G    | 24:02:01G | 27:05:02G    | 44:02:01G | 01:02:01G    | 05:01:01G | 08:01:01G       | 11:01:01G |
| CV12         | 03:01:01G    | 25:01:01G | 18:01:01G    | 40:01:01G | 03:04:01G    | 12:03:01G | 04:01:01G       | 13:01:01G |
